# Supplementary material
Source: Springer Nature journal article supplement (https://www.springermedizin.de/resource/supplementary/12890_2011_340_MOESM2_ESM.pdf/9504970)

Figure 2. Results from validation of the CART model – ROC Curve

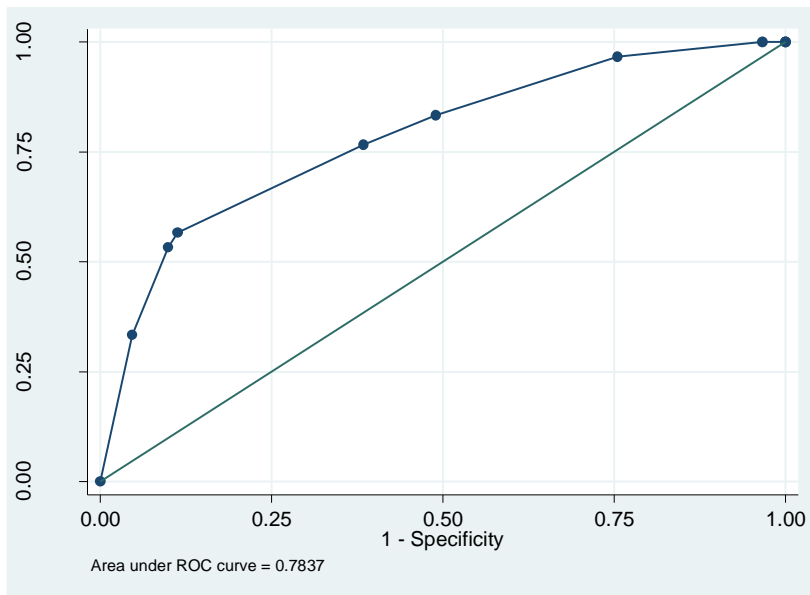

Supplement: MOESM2 [file 9504970]
